# Supplementary material for: Multi-Omic Biomarkers Improve Indeterminate Pulmonary Nodule Malignancy Risk Assessment
Source: MDPI journal article supplement (doi:10.3390/cancers15133418), 2023-06-29
Supplement: s1 [file s1]

## Supplemental Materials

### Supplemental Methods:

To enhance the reproducibility of radiomics analysis, we developed a 5-step feature selection process: 1) repeatability analysis using RIDER lung CT dataset<sup>65</sup>, only the features with intraclass correlation coefficient (ICC) greater than 0.85 were retained. 2) reproducibility analysis on multiple observers using NSCLC-Radiomics-Interobserver1 dataset<sup>66</sup>, only the features with ICC greater than 0.75 were retained. 3) reproducibility analysis on convolution kernels using an internal subset (N=86) of CT images with paired soft and sharp convolution-kernel reconstructions. We smoothed the images from sharp kernels first and compared them to the images from soft kernels. Only the features with ICC greater than 0.90 were retained. 4) information content analysis using a cohort with CT images of pulmonary nodules in all sizes (N=496) and the method described in Du D et al<sup>67</sup>. 5) redundancy analysis using the same cohort in 4). Of every two features with Pearson correlation < 0.90, the feature with the larger mean ICC was retained. After the feature selection, 94 out of 851 radiomics features that exhibited the highest level of information, repeatability and reproducibility with least redundancy were selected.

**Table S1. List of antibodies printed on arrays.**

| Antibody Name | Supplier                 | Cat #          | Array Type |
|---------------|--------------------------|----------------|------------|
| EpCAM         | SDI                      | 1931.00.02     | Auto       |
| CP            | SDI                      | 1879.00.02     | Auto       |
| CLEC3B        | SDI                      | 1875.00.02     | Auto       |
| ADRB2         | SDI                      | 1956.00.02     | Auto       |
| OWL           | One World Labs           | 500-P227       | Auto       |
| CEACAM5       | SDI                      | 1667.00.02     | Auto       |
| CTSE          | Abnova                   | H00001510-B01P | Auto       |
| MUC5AC        | Abnova                   | H00004586-M07  | Auto       |
| KRT10         | Abnova                   | H00003858-M01  | Auto       |
| GLI3          | Abnova                   | H00002737-M01  | Auto       |
| CD44          | SDI                      | 4084.00.02     | Auto       |
| CREBBP        | Aviva                    | ARP43609_P050  | Auto       |
| SFTPB         | Aviva                    | ARP41411_P050  | Auto       |
| CTTN          | Aviva                    | ARP52067_P050  | Auto       |
| ST6GALNAC1    | Aviva                    | ARP47446_P050  | Auto       |
| ST3GAL1       | Aviva                    | ARP45410_P050  | Auto       |
| ALDOC         | Aviva                    | ARP48274_P050  | Auto       |
| SIGLEC6       | Aviva                    | ARP41925_P050  | Auto       |
| SELE          | Aviva                    | ARP59109_P050  | Auto       |
| CCND1         | Santa Cruz Biotechnology | sc-718         | Auto       |
| NEU3          | SDI                      | 2163.00.02     | Auto       |
| ASH2L         | SDI                      | 2129.00.02     | Auto       |
| XBP1          | SDI                      | 2054.00.02     | Auto       |
| CD46          | SDI                      | 2050.00.02     | Auto       |
| TET1          | SDI                      | 2126.00.02     | Auto       |

|                |                          |            |      |
|----------------|--------------------------|------------|------|
| EN1            | SDI                      | 2104.00.02 | Auto |
| CTPS           | SDI                      | 2337.00.02 | Auto |
| WNT4           | SDI                      | 2299.00.02 | Auto |
| TPM3           | SDI                      | 2272.00.02 | Auto |
| IFNg           | SDI                      | 2335.00.02 | Auto |
| VHL            | SDI                      | 2319.00.02 | Auto |
| UBE2S          | OWL                      | AP2007Ib   | Auto |
| KDM5B          | SDI                      | 2226.00.02 | Auto |
| PW-1L (CCSP-1) | CCSP-1 Antibody          | PW-1L      | Auto |
| TCEB3          | Abcam                    | AB88087    | Auto |
| NTRK1-3        | Abcam                    | AB89925    | Auto |
| COL18A1        | LSBio                    | LS-C104551 | Auto |
| THBS1          | LSBio                    | LS-B2570   | Auto |
| C4B            | Abcam                    | AB54902    | Auto |
| COL5A3         | Santa Cruz Biotechnology | sc-240246  | Auto |
| SACS           | SDI                      | 2434.00.02 | Auto |
| MBL2           | SDI                      | 2445.00.02 | Auto |
| PRCC           | SDI                      | 2518.00.02 | Auto |
| Novus          | Novus                    | NBP2-14835 | Auto |
| SUFU           | SDI                      | 2487.00.02 | Auto |
| BSG            | SDI                      | 2602.00.02 | Auto |
| MUC16          | SDI                      | 2545.00.02 | Auto |
| KLK13          | SDI                      | 2633.00.02 | Auto |
| PLG            | SDI                      | 2640.00.02 | Auto |
| ESR2           | SDI                      | 2625.00.02 | Auto |
| AFP            | SDI                      | 2544.00.02 | Auto |
| CD44           | Abcam                    | ab41478    | Auto |
| XRCC3          | SDI                      | 2728.00.02 | Auto |
| CXADR          | SDI                      | 2674.00.02 | Auto |
| EPHA2          | SDI                      | 2662.00.02 | Auto |
| EGF            | SDI                      | 2661.00.02 | Auto |
| IER3           | SDI                      | 2827.00.02 | Auto |
| CASP8          | SDI                      | 2802.00.02 | Auto |
| EVI1           | SDI                      | 2810.00.02 | Auto |
| JMJD1C         | SDI                      | 2983.00.02 | Auto |
| DST            | SDI                      | 2972.00.02 | Auto |
| EGFR           | SDI                      | 3177.00.02 | Auto |
| IL7            | SDI                      | 3340.00.02 | Auto |
| F13A1          | SDI                      | 3319.00.02 | Auto |
| CSF2           | SDI                      | 3309.00.02 | Auto |
| ALPL           | SDI                      | 3292.00.02 | Auto |

|          |                          |                |      |
|----------|--------------------------|----------------|------|
| SCN3B    | SDI                      | 3747.00.02     | Auto |
| OWL      | One World Labs           | 20278          | Auto |
| BCL3     | Santa Cruz Biotechnology | sc-13038       | Auto |
| SPDYA    | SDI                      | 4425.00.02     | Auto |
| SUZ12    | SDI                      | 4616.00.02     | Auto |
| SLC30A8  | Origene                  | TA590368       | Auto |
| SLC30A8  | LSBio                    | LS-C296475     | Auto |
| ARGHDIB  | One World Labs           | EB10223        | Auto |
| IL13     | R&D systems              | MAB2131        | Auto |
| TFF3     | R&D systems              | MAB4408        | Auto |
| TNFAIP6  | R&D systems              | MAB2104        | Auto |
| FETUB    | R&D systems              | MAB17251       | Auto |
| CD44     | SDI                      | 2806.00.02     | Auto |
| INHA     | SDI                      | 3342.00.02     | Auto |
| YES1     | SDI                      | 2692.00.02     | Auto |
| PHB      | SDI                      | 2684.00.02     | Auto |
| RECQL4   | SDI                      | 2547.00.02     | Auto |
| WNT5B    | SDI                      | 2301.00.02     | Auto |
| EPHX1    | Abnova                   | H00002052-B01P | Auto |
| SMARCA2  | Abcam                    | ab15597        | Auto |
| CA2      | Abcam                    | AB6621-5       | Auto |
| HIST1H1D | Abcam                    | ab24174        | Auto |
| HLF      | Abnova                   | H00003131-M01  | Auto |
| ILK      | Sigma                    | I1907          | Auto |
| VWF      | Sigma                    | F3520          | Auto |
| HP       | Sigma                    | H8636-1vI      | Auto |
| BMF      | Sigma                    | B1684-100ug    | Auto |
| AOAH     | SDI                      | 4572.00.02     | Auto |
| ENO2     | SDI                      | 3318.00.02     | Auto |
| SIN3A    | Santa Cruz Biotechnology | SC-994         | Auto |
| ADRB2    | SDI                      | 1955.00.02     | Auto |
| CLSTN2   | SDI                      | 3582.00.02     | Auto |
| ITGA6    | SDI                      | 2465.00.02     | Auto |
| ABL2     | SDI                      | 2327.00.02     | Auto |
| REC8     | SDI                      | 2947.00.02     | Auto |
| WNT7A    | SDI                      | 2303.00.02     | Auto |
| UTP20    | SDI                      | 1691.00.02     | Auto |
| SPINK2   | SDI                      | 3257.00.02     | Auto |
| IL2      | SDI                      | 2041.00.02     | Auto |
| VWF      | SDI                      | 3270.00.02     | Auto |
| RGL1     | SDI                      | 3826.00.02     | Auto |

|                     |                |               |      |
|---------------------|----------------|---------------|------|
| SELENBP1            | SDI            | 2643.00.02    | Auto |
| CCL14               | Abcam          | AB9845        | Auto |
| IGF1R               | SDI            | 2384.00.02    | Auto |
| CD33                | SDI            | 1918.00.02    | Auto |
| FZD2                | Aviva          | ARP41236_P050 | Auto |
| CCR5                | SDI            | 1927.00.02    | Auto |
| XRCC5               | SDI            | 2730.00.02    | Auto |
| DDHD2               | SDI            | 2140.00.02    | Auto |
| CDH20               | SDI            | 3574.00.02    | Auto |
| GAPDH               | Aviva          | ARP40175_P050 | Auto |
| LIN61               | SDI            | 2959.00.02    | Auto |
| CALD1               | SDI            | 2238.00.02    | Auto |
| CCR2                | SDI            | 1945.00.02    | Auto |
| BTK                 | SDI            | 2656.00.02    | Auto |
| IFNB1               | SDI            | 2459.00.02    | Auto |
| JAZf1               | SDI            | 2716.00.02    | Auto |
| ELP2                | SDI            | 3087.00.02    | Auto |
| NOV                 | SDI            | 3386.00.02    | Auto |
| PSAT1               | Aviva          | ARP46303_P050 | Auto |
| USH1c               | SDI            | 2092.00.02    | Auto |
| GAK1                | SDI            | 2946.00.02    | Auto |
| RPS6KA2 (S380)      | Cell Signaling | 9335          | Auto |
| IMMP1L              | SDI            | 1729.00.02    | Auto |
| CCL20               | Abcam          | AB89395       | Auto |
| CHUK (S176/180)     | Cell Signaling | 2697          | Auto |
| WNT3A               | Cell Signaling | 2721          | Auto |
| RBL2                | Abcam          | AB89459       | Auto |
| MAPK1/3 (T202/Y204) | Cell Signaling | 4370          | Auto |
| LMN1                | SDI            | 3853.00.02    | Auto |
| FCN2                | SDI            | 2446.00.02    | Auto |
| PIK3CD              | R&D systems    | MAB2687       | Auto |
| FOXO1               | SDI            | 2558.00.02    | Auto |
| ERCC2               | SDI            | 2585.00.02    | Auto |
| WNK2                | SDI            | 2591.00.02    | Auto |
| EFNB3               | Abcam          | AB89474       | Auto |
| hda-1               | SDI            | 3866.00.02    | Auto |
| SPFH2               | SDI            | 2132.00.02    | Auto |
| LPXN                | SDI            | 4391.00.02    | Auto |
| TMPRSS11E           | SDI            | 4546.00.02    | Auto |
| HSPA5               | SDI            | 2822.00.02    | Auto |
| SPINK1              | SDI            | 3475.00.02    | Auto |

|                  |                          |            |      |
|------------------|--------------------------|------------|------|
| DAPK1            | SDI                      | 2848.00.02 | Auto |
| TNC              | SDI                      | 4170.00.02 | Auto |
| HOXD13           | Aviva                    | OAAB07467  | Auto |
| DCP1B            | Aviva                    | OAAB06487  | Auto |
| CXCL5            | SDI                      | 3314.00.02 | Auto |
| FSTL1            | SDI                      | 3141.00.02 | Auto |
| CSTF1            | SDI                      | 2715.00.02 | Auto |
| IL12RB2          | SDI                      | 2981.00.02 | Auto |
| GPR125           | SDI                      | 2902.00.02 | Auto |
| ANGPTL4          | SDI                      | 2620.00.02 | Auto |
| FBXW7            | SDI                      | 3049.00.02 | Auto |
| PHLPPL           | SDI                      | 3818.00.02 | Auto |
| CTSD             | SDI                      | 2258.00.02 | Auto |
| CDH23            | SDI                      | 2094.00.02 | Auto |
| SERPIND1         | R&D systems              | MAB3198    | Auto |
| IL34             | R&D systems              | MAB52651   | Auto |
| IL1B             | R&D systems              | MAB601     | Auto |
| CXCL12           | R&D systems              | MAB350     | Auto |
| PCSK9            | R&D systems              | MAB28881   | Auto |
| COL4A3           | Santa Cruz Biotechnology | sc-18178   | Auto |
| MGST1            | Santa Cruz Biotechnology | sc-17003   | Auto |
| SDC1             | Santa Cruz Biotechnology | sc-7099    | Auto |
| CBLC             | Santa Cruz Biotechnology | sc-8371    | Auto |
| IL28A            | R&D systems              | MAB15871   | Auto |
| TLR9             | Santa Cruz Biotechnology | SC-47723   | Auto |
| HIF1A            | Santa Cruz Biotechnology | SC-13515   | Auto |
| ERBB4            | R&D systems              | MAB11311   | Auto |
| MAPK11           | R&D systems              | MAB5885    | Auto |
| EGFR             | Santa Cruz Biotechnology | sc-003     | Auto |
| GPANK1 (BAT4)    | Santa Cruz Biotechnology | SC-79861   | Auto |
| MAP2K4           | R&D systems              | MAB3390    | Auto |
| PTK2             | Santa Cruz Biotechnology | sc-558G    | Auto |
| ENO2             | R&D systems              | AF5169     | Auto |
| CDK1(Y15)        | R&D systems              | AF888      | Auto |
| IL15             | R&D systems              | MAB247     | Auto |
| PW-4H (CCSP-1)   | CCSP-1 antibody          | PW-4H      | Auto |
| IP-5.1H (CCSP-1) | CCSP-1 antibody          | IP-5.1H    | Auto |
| 4-5F1 (CCSP-2)   | CCSP-2 antibody          | 4-5F1      | Auto |
| 3-2E5 (CCSP-2)   | CCSP-2 antibody          | 3-2E5      | Auto |
| ATF3             | Santa Cruz Biotechnology | SC-188     | Auto |
| MYC              | Santa Cruz Biotechnology | SC-788     | Auto |

|                          |                |               |      |
|--------------------------|----------------|---------------|------|
| CDCP1                    | R&D systems    | MAB26661      | Auto |
| SPRED1                   | R&D systems    | AF5067        | Auto |
| IL17D                    | R&D systems    | MAB1504       | Auto |
| MAP2K4 (S257/T261)       | R&D systems    | AF2990        | Auto |
| MDH2                     | Aviva          | ARP48286_T100 | Auto |
| CXCR3                    | SDI            | 2613.00.02    | Auto |
| AXL                      | Aviva          | ARP59004_P050 | Auto |
| HOXC11                   | Aviva          | ARP31960_P050 | Auto |
| FANCC                    | SDI            | 2529.00.02    | Auto |
| BUB1B                    | SDI            | 2373.00.02    | Auto |
| WISP1                    | SDI            | 2320.00.02    | Auto |
| THBS2                    | SDI            | 2442.00.02    | Auto |
| GDF15                    | Aviva          | ARP42200_P050 | Auto |
| KRT10                    | Aviva          | ARP41730_P050 | Auto |
| CDC25C                   | SDI            | 2908.00.02    | Auto |
| MGAT3                    | Abnova         | H00004248-M01 | Auto |
| TBC1D3                   | SDI            | 2080.00.02    | Auto |
| CEACAM1                  | SDI            | 2037.00.02    | Auto |
| TNFRSF10A                | SDI            | 2646.00.02    | Auto |
| C4orf7                   | SDI            | 2062.00.02    | Auto |
| MMP16                    | SDI            | 2266.00.02    | Auto |
| TRPV6                    | SDI            | 4347.00.02    | Auto |
| CHUK (S176)/IKBKB (S177) | Cell Signaling | 2078          | Auto |
| FH                       | SDI            | 2488.00.02    | Auto |
| PGF                      | SDI            | 2624.00.02    | Auto |
| MMEL1                    | SDI            | 3215.00.02    | Auto |
| CLNS1A                   | SDI            | 2657.00.02    | Auto |
| ULBP2                    | SDI            | 2708.00.02    | Auto |
| BTN3A2                   | SDI            | 2801.00.02    | Auto |
| WNT10A                   | SDI            | 2309.00.02    | Auto |
| ATP6AP1                  | SDI            | 2229.00.02    | Auto |
| RAB6B                    | SDI            | 2432.00.02    | Auto |
| XIAP                     | SDI            | 2995.00.02    | Auto |
| TIE1                     | SDI            | 2704.00.02    | Auto |
| ITGAV                    | SDI            | 2466.00.02    | Auto |
| CD276                    | SDI            | 2622.00.02    | Auto |
| IL1B                     | SDI            | 2360.00.02    | Auto |
| PTGS1                    | SDI            | 2430.00.02    | Auto |
| SERPINB5                 | LSBio          | LS-C104541    | Auto |
| WASL                     | Abnova         | H00008976-M04 | Auto |
| TSP50                    | SDI            | 1719.00.02    | Auto |

|             |                          |               |      |
|-------------|--------------------------|---------------|------|
| MES3        | SDI                      | 3858.00.02    | Auto |
| Lcp2        | SDI                      | 2985.00.02    | Auto |
| NOTCH1      | SDI                      | 2273.00.02    | Auto |
| XPC         | SDI                      | 2551.00.02    | Auto |
| MES2        | SDI                      | 3857.00.02    | Auto |
| CLGN        | SDI                      | 3127.00.02    | Auto |
| IL4R        | SDI                      | 1968.00.02    | Auto |
| ENO1        | Abcam                    | ab35075       | Auto |
| LMTK2       | SDI                      | 3758.00.02    | Auto |
| IL19        | SDI                      | 2447.00.02    | Auto |
| MYST3       | SDI                      | 2162.00.02    | Auto |
| SFN         | SDI                      | 2435.00.02    | Auto |
| NCOA6       | SDI                      | 3683.00.02    | Auto |
| DEPDC1      | SDI                      | 2663.00.02    | Auto |
| METTL3      | GenWay                   | 18-003-42560  | Auto |
| TRAF4       | SDI                      | 1717.00.02    | Auto |
| NRP1        | SDI                      | 3037.00.02    | Auto |
| ACADM       | Novus                    | NB 100-1121   | Auto |
| MUC2 (SMUC) | Abcam                    | AB22712       | Auto |
| RALA        | BD Transduction          | 610221        | Auto |
| SERPINB6    | Novus                    | NB100-93464   | Auto |
| PRG2        | Abcam                    | AB20291-100   | Auto |
| MARCO       | Abcam                    | ab33453       | Auto |
| ITGB1       | Abcam                    | AB7168        | Auto |
| IFNG        | Abcam                    | ab13783       | Auto |
| HIF1A       | Santa Cruz Biotechnology | SC-12542      | Auto |
| TNFRSF1B    | Abcam                    | AB10503       | Auto |
| POLG2       | SDI                      | 2170.00.02    | Auto |
| EPHA4       | Abnova                   | H00002043-M03 | Auto |
| MMP11       | SDI                      | 1980.00.02    | Auto |
| SKI         | SDI                      | 2755.00.02    | Auto |
| STAT1       | SDI                      | 2697.00.02    | Auto |
| PSCD3       | SDI                      | 2057.00.02    | Auto |
| TNFRSF9     | Abcam                    | AB89085       | Auto |
| FBXW7       | SDI                      | 3050.00.02    | Auto |
| LALBA       | SDI                      | 3353.00.02    | Auto |
| MET         | Santa Cruz Biotechnology | sc-161        | Auto |
| ARFIP2      | Abcam                    | AB56988       | Auto |
| ERBB3       | SDI                      | 2259.00.02    | Auto |
| SCN9a       | SDI                      | 2056.00.02    | Auto |
| PARK7       | Sigma                    | D2943         | Auto |

|                |                          |               |      |
|----------------|--------------------------|---------------|------|
| HDAC2          | SDI                      | 2821.00.02    | Auto |
| C10orf10       | SDI                      | 2083.00.02    | Auto |
| AR             | SDI                      | 2215.00.02    | Auto |
| AAMP           | SDI                      | 2443.00.02    | Auto |
| AQP2           | SDI                      | 1962.00.02    | Auto |
| IL20(std)      | R&D systems              | MAB11027      | Auto |
| SMAD4          | Santa Cruz Biotechnology | sc-7966x      | Auto |
| TNFRSF1B       | Abcam                    | ab17038       | Auto |
| TARBP1         | SDI                      | 3072.00.02    | Auto |
| BRF2           | SDI                      | 2713.00.02    | Auto |
| CCNB2          | SDI                      | 2900.00.02    | Auto |
| TGIF1          | SDI                      | 3059.00.02    | Auto |
| XRCC1          | SDI                      | 2727.00.02    | Auto |
| LHX1           | SDI                      | 2152.00.02    | Auto |
| FOLR3          | SDI                      | 2148.00.02    | Auto |
| SETD5          | SDI                      | 2256.00.02    | Auto |
| RPS6KA5 (S212) | R&D systems              | AF1036        | Auto |
| PF4            | Abcam                    | AB9561        | Auto |
| RAD23A         | Abcam                    | ab55725       | Auto |
| MAPK7          | Santa Cruz Biotechnology | Sc-5626       | Auto |
| RAPGEF1        | Santa Cruz Biotechnology | sc-869        | Auto |
| GALK1          | Abcam                    | AB14023       | Auto |
| IL4            | R&D systems              | MAB204        | Auto |
| CTLA4          | SDI                      | 1964.00.02    | Auto |
| CDKN1A         | Santa Cruz Biotechnology | sc-397        | Auto |
| TSG101         | Santa Cruz Biotechnology | SC-22774      | Auto |
| CBL            | Santa Cruz Biotechnology | sc-170        | Auto |
| WB-4H (CCSP-1) | CCSP-1 antibody          | WB-4H         | Auto |
| 3-1H1 (CCSP-2) | CCSP-2 antibody          | 3-1H1         | Auto |
| MET            | R&D systems              | MAB3582       | Auto |
| SFRP1          | Abcam                    | ab7797        | Auto |
| SFRP4          | R&D                      | AF3697        | Auto |
| A2M            | R&D                      | AF2420        | Auto |
| FOLR3          | R&D                      | AF4148        | Auto |
| CRKL           | R&D                      | AF2964        | Auto |
| HSPA8          | R&D systems              | AF3398        | Auto |
| KRT8           | R&D systems              | MAB1938       | Auto |
| INPP5D         | R&D systems              | MAB4356       | Auto |
| FABP1          | R&D systems              | MAB3165       | Auto |
| FKBP2          | R&D systems              | MAB2317       | Auto |
| epb4113        | Aviva                    | ARP73951_P050 | Auto |



|                |                |               |           |
|----------------|----------------|---------------|-----------|
| cdca7l         | Aviva          | ARP57292_P050 | Auto      |
| chtf18         | Aviva          | ARP57589_P050 | Auto      |
| fcgr2a         | Aviva          | OAAB10024     | Auto      |
| ints10         | Aviva          | ARP70587_P050 | Auto      |
| hmga1          | Aviva          | ARP38111_P050 | Auto      |
| lrrc45         | Aviva          | OAAB07613     | Auto      |
| lingo1         | Aviva          | OAAB04259     | Auto      |
| hif3a          | Aviva          | ARP39936_T100 | Auto      |
| epb41l3        | Aviva          | OAGA01718     | Auto      |
| rps13          | Aviva          | ARP56179_P050 | Auto      |
| rps13          | Aviva          | OAAB02220     | Auto      |
| hmga1          | Aviva          | OAAB05695     | Auto      |
| ankrd36b       | Aviva          | ARP68793_P050 | Auto      |
| lingo1         | Aviva          | OAAB02513     | Auto      |
| chtf18         | Aviva          | OAAB09272     | Auto      |
| cdca7l         | Aviva          | OAAB17991     | Auto      |
| hif3a          | One World Labs | TA800720      | Auto      |
| ints10         | One World Labs | ESAP11026     | Auto      |
| pla2g4c        | One World Labs | R12-3333      | Auto      |
| hif3a          | One World Labs | EB10073       | Auto      |
| s100a7l2       | One World Labs | R12-3476      | Auto      |
| s100a7l2       | One World Labs | ENT4202       | Auto      |
| fcgr2a         | One World Labs | TA500645      | Auto      |
| pla2g4c        | One World Labs | EB10114       | Auto      |
| fcgr2a         | One World Labs | UM500051      | Auto      |
| cdca7l         | One World Labs | TA803020      | Auto      |
| epb41l3        | One World Labs | EB07024       | Auto      |
| VGCC (CACNA1A) | Aviva          | oabb0146      | Auto      |
| Ta (PNMA2)     | Aviva          | arp52314_p050 | Auto      |
| Yo (PCA2 CDR2) | Aviva          | arp51161_t100 | Auto      |
| Rc             | Aviva          | oaaan01784    | Auto      |
| Sox            | Aviva          | arp31735_p050 | Auto      |
| GABA-b         | R&D systems    | af7000        | Auto      |
| GAD65          | R&D systems    | af2247        | Auto      |
| CRMP5          | Novus          | nbp1-33419    | Auto      |
| Hu (ELAVL2)    | Aviva          | oasg03682     | Auto      |
| Ma (PNMA1)     | Aviva          | arp33097_p050 | Auto      |
| EpCAM          | SDI            | 1931.00.02    | Auto      |
| NTNG2          | SDI            | 3686.00.02    | Proteomic |
| NAV3           | SDI            | 3682.00.02    | Proteomic |
| FRMD3          | SDI            | 3757.00.02    | Proteomic |

|          |              |               |           |
|----------|--------------|---------------|-----------|
| THBS3    | SDI          | 3819.00.02    | Proteomic |
| KIFC3    | SDI          | 4661.00.02    | Proteomic |
| NELL2    | SDI          | 4603.00.02    | Proteomic |
| SLC30A8  | Origene      | TA590368      | Proteomic |
| SLC30A8  | LSBio        | LS-C296475    | Proteomic |
| PTPRU    | R&D systems  | MAB7475       | Proteomic |
| lingo1   | Aviva        | OAAB04259     | Proteomic |
| CD22     | PeproTech    | 500-P227      | Proteomic |
| PHB      | SDI          | 2684.00.02    | Proteomic |
| PHLPPL   | SDI          | 3818.00.02    | Proteomic |
| TRPV6    | SDI          | 4347.00.02    | Proteomic |
| FSTL1    | SDI          | 3141.00.02    | Proteomic |
| hda-1    | SDI          | 3866.00.02    | Proteomic |
| SPFH2    | SDI          | 2132.00.02    | Proteomic |
| MMP16    | SDI          | 2266.00.02    | Proteomic |
| ERCC2    | SDI          | 2585.00.02    | Proteomic |
| TNFRSF1B | Abcam        | AB10503       | Proteomic |
| ARFIP2   | Abcam        | AB56988       | Proteomic |
| LPXN     | SDI          | 4391.00.02    | Proteomic |
| s100a7l2 | AssayBiotech | R12-3476      | Proteomic |
| NCK1     | SDI          | 2480.00.02    | Proteomic |
| fcgr2a   | Aviva        | OAAB10024     | Proteomic |
| ankrd36b | Aviva        | ARP68793_P050 | Proteomic |
| epb41l3  | Aviva        | ARP73951_P050 | Proteomic |
| INHBC    | Aviva        | OASG03873     | Proteomic |
| TGFB2    | Aviva        | OASG07155     | Proteomic |
| CD70     | Aviva        | OASG01345     | Proteomic |
| GPR19    | Aviva        | OASG03154     | Proteomic |
| LST1     | Aviva        | ARP64242      | Proteomic |
| RUNX3    | Aviva        | OASG06510     | Proteomic |
| GADD45G  | Aviva        | OASG02914     | Proteomic |
| S100A7   | Aviva        | OACD07110     | Proteomic |
| INHBA    | Aviva        | OASG03869     | Proteomic |
| KIFC3    | ProteinTech  | 10125-2-AP    | Proteomic |
| CAMK1    | Aviva        | ARP88196      | Proteomic |
| NELL2    | Thermo       | PA5-57373     | Proteomic |
| ATG7     | Aviva        | OAAJ06604     | Proteomic |
| NAV3     | Thermo       | PA5-56932     | Proteomic |
| BRCA1    | Novus        | NB100-598SS   | Proteomic |
| THBS3    | Aviva        | OAAB14510     | Proteomic |
| CSF3     | Aviva        | OAAB15063     | Proteomic |

|                  |                          |                  |           |
|------------------|--------------------------|------------------|-----------|
| EPHA2            | Aviva                    | OAAB17127        | Proteomic |
| TECTA            | Thermo                   | PA5-80102        | Proteomic |
| IL13RA1          | R&D systems              | MAB1462          | Proteomic |
| CSF2             | Abcam                    | AB14024          | Proteomic |
| CRB3             | Novus                    | NBP1-81185       | Proteomic |
| RAB5A            | Abcam                    | ab18211          | Proteomic |
| CRB3             | Novus                    | NBP1-98328       | Proteomic |
| SMAD2            | Novus                    | NB100-56462SS    | Proteomic |
| MED12            | Novus                    | NB100-2357       | Proteomic |
| SMAD2            | R&D systems              | MAB4037-SP       | Proteomic |
| MED12            | Aviva                    | OASG07308        | Proteomic |
| BECN1            | BD                       | 612112           | Proteomic |
| MED12            | Aviva                    | OACA09933        | Proteomic |
| FN1              | BD                       | 610077           | Proteomic |
| PRKCSH           | Novus                    | NBP2-38492       | Proteomic |
| BAX              | BD                       | 610982           | Proteomic |
| MYO18B           | Novus                    | NBP1-89967       | Proteomic |
| CSF2             | Abcam                    | ab54429          | Proteomic |
| DNAJC10          | Abnova                   | H00054431-M01    | Proteomic |
| LIFR             | Abcam                    | AB89792          | Proteomic |
| SLC9A3R1         | Abcam                    | ab9526-100       | Proteomic |
| FMN1             | SDI                      | 4411.00.02       | Proteomic |
| EXT2             | SDI                      | 2486.00.02       | Proteomic |
| CSF3             | SDI                      | 3310.00.02       | Proteomic |
| CDKN1A           | Biolegend                | 626701           | Proteomic |
| CD24             | AbD Serotec              | MCA1379T         | Proteomic |
| MUC17            | AbD Serotec              | MCA1837          | Proteomic |
| PDLIM1           | Abcam                    | AB77142          | Proteomic |
| VWF              | Abcam                    | ab6994           | Proteomic |
| B2M              | Abcam                    | ab27588-100      | Proteomic |
| PPIE             | Abnova                   | H00010450-M02    | Proteomic |
| CTSD             | R&D systems              | MAB1014          | Proteomic |
| REG3A            | R&D systems              | AF5940           | Proteomic |
| FBLN5            | R&D systems              | MAB3095          | Proteomic |
| FUT3             | R&D systems              | MAB4068          | Proteomic |
| cd160            | R&D systems              | MAB6700          | Proteomic |
| AFP              | R&D systems              | MAB1368          | Proteomic |
| CXCL12(SDF1)     | R&D systems              | MAB350           | Proteomic |
| CSF3(GCSF)       | R&D systems              | MAB214           | Proteomic |
| S100A7/Psoriasin | n/a                      | n/a (clone: 396) | Proteomic |
| TP73             | Santa Cruz Biotechnology | sc-56190         | Proteomic |

|          |                          |                    |           |
|----------|--------------------------|--------------------|-----------|
| HIST1H1D | Abcam                    | ab24174            | Proteomic |
| THBS1    | LSBio                    | LS-B2570           | Proteomic |
| EPHA2    | Santa Cruz Biotechnology | sc-924             | Proteomic |
| EGFR     | Santa Cruz Biotechnology | sc-003             | Proteomic |
| RAF1     | Santa Cruz Biotechnology | sc-7267            | Proteomic |
| HGFAC    | Santa Cruz Biotechnology | sc-7949            | Proteomic |
| CDKN2B   | Santa Cruz Biotechnology | sc-613 (lot C0410) | Proteomic |
| LAMA1    | Santa Cruz Biotechnology | sc-5582            | Proteomic |
| Cdkn2a   | Santa Cruz Biotechnology | sc-32749           | Proteomic |
| PGK1     | Santa Cruz Biotechnology | sc-48342           | Proteomic |
| IL13RA1  | SDI                      | 2505.00.02         | Proteomic |
| DDB2     | SDI                      | 2555.00.02         | Proteomic |
| BRCA1    | SDI                      | 4099.00.02         | Proteomic |
| TGFB2    | SDI                      | 2441.00.02         | Proteomic |
| COL5A3   | Santa Cruz Biotechnology | sc-240246          | Proteomic |
| PLG      | SDI                      | 2640.00.02         | Proteomic |
| BRD2     | SDI                      | 2799.00.02         | Proteomic |
| BIRC2    | SDI                      | 2969.00.02         | Proteomic |
| CD70     | SDI                      | 2651.00.02         | Proteomic |
| ABCA3    | SDI                      | 3828.00.02         | Proteomic |
| GPR19    | SDI                      | 2676.00.02         | Proteomic |
| LST1     | SDI                      | 3011.00.02         | Proteomic |
| GADD45G  | SDI                      | 2966.00.02         | Proteomic |
| INHBA    | SDI                      | 3343.00.02         | Proteomic |
| CAMK1    | SDI                      | 3120.00.02         | Proteomic |
| ATG7     | SDI                      | 3552.00.02         | Proteomic |
| ZMIZ1    | SDI                      | 3719.00.02         | Proteomic |
| BCL3     | Santa Cruz Biotechnology | sc-13038           | Proteomic |
| SOCS7    | SDI                      | 2192.00.02         | Proteomic |
| TRPV6    | Aviva                    | OACD01210          | Proteomic |
| NTNG2    | ProteinTech              | 12910-2-AP         | Proteomic |
| NTNG2    | Sigma                    | HPA071290          | Proteomic |
| TRPV6    | Novus                    | NBP2-32372         | Proteomic |
| EVI1     | SDI                      | 2810.00.02         | Glycomic  |
| SIGLEC6  | Aviva                    | ARP41925_P050      | Glycomic  |
| BMF      | Sigma                    | B1684-100ug        | Glycomic  |
| TFF3     | R&D systems              | MAB4408            | Glycomic  |
| TFF3     | Aviva                    | OACD07660          | Glycomic  |
| WNT5B    | SDI                      | 2301.00.02         | Glycomic  |
| ALPL     | SDI                      | 3292.00.02         | Glycomic  |
| PHB      | SDI                      | 2684.00.02         | Glycomic  |

|                |                 |               |          |
|----------------|-----------------|---------------|----------|
| VHL            | SDI             | 2319.00.02    | Glycomic |
| BSG            | SDI             | 2602.00.02    | Glycomic |
| JMJD1C         | SDI             | 2983.00.02    | Glycomic |
| JMJD1C         | Abnova          | H00221037-M03 | Glycomic |
| JMJD1C         | Novus           | NBP1-77072    | Glycomic |
| FETUB          | R&D systems     | MAB17251      | Glycomic |
| C4B            | Abcam           | AB54902       | Glycomic |
| AFP            | SDI             | 2544.00.02    | Glycomic |
| TET1           | SDI             | 2126.00.02    | Glycomic |
| ILK            | Sigma           | I1907         | Glycomic |
| ILK            | R&D systems     | 443208        | Glycomic |
| ILK            | ProteinTech     | 12955-I-AP    | Glycomic |
| TNFAIP6        | R&D systems     | MAB2104       | Glycomic |
| CD22           | PeproTech       | 500-P227      | Glycomic |
| COL24A1        | Abcam           | AB57249       | Glycomic |
| COL24A1        | Abnova          | H00255631-M07 | Glycomic |
| CD44           | SDI             | 4084.00.02    | Glycomic |
| SUFU           | SDI             | 2487.00.02    | Glycomic |
| HP             | Sigma           | H8636-1vI     | Glycomic |
| SCN3B          | SDI             | 3747.00.02    | Glycomic |
| ALDOC          | Aviva           | ARP48274_P050 | Glycomic |
| EN1            | SDI             | 2104.00.02    | Glycomic |
| GALK1          | Abnova          | H00002584-M01 | Glycomic |
| TNFRSF8        | SDI             | 3490.00.02    | Glycomic |
| KDM5B          | SDI             | 2226.00.02    | Glycomic |
| SLC30A8        | Origene         | TA590368      | Glycomic |
| PW-1L (CCSP-1) | CCSP-1 Antibody | PW-1L         | Glycomic |
| THBS1          | LSBio           | LS-B2570      | Glycomic |
| EDN1           | Abnova          | H00001906-M01 | Glycomic |
| KRT10          | Abnova          | H00003858-M01 | Glycomic |
| STIP1          | Abcam           | AB37752       | Glycomic |
| CASP8          | SDI             | 2802.00.02    | Glycomic |
| VWF            | Sigma           | F3520         | Glycomic |
| MUC17          | AbD Serotec     | MCA1837       | Glycomic |
| MUC5AC         | Abnova          | H00004586-M07 | Glycomic |
| MUC16          | SDI             | 2545.00.02    | Glycomic |
| MUC6           | Novus           | 46760002      | Glycomic |
| MUC16 (CA125)  | Abcam           | AB81871       | Glycomic |
| MUC1           | Abcam           | AB15481       | Glycomic |

**Table S2. Distribution of CT parameters in FH cohort 1 and 2.**

| Variable                   | FH1<br>(N = 135) | FH2<br>(N = 149) |
|----------------------------|------------------|------------------|
| Contrast enhancement (yes) | 56 (41.5)        | 36 (24.2)        |
| kVp                        |                  |                  |
| 80                         | 1 (0.7)          | 1 (0.7)          |
| 100                        | 13 (9.6)         | 8 (5.4)          |
| 110                        | 1 (0.7)          | 0 (0.0)          |
| 120                        | 117 (86.7)       | 136 (91.3)       |
| 130                        | 2 (1.5)          | 3 (2.0)          |
| 140                        | 1 (0.7)          | 1 (0.7)          |
| Scan modality              |                  |                  |
| GE                         | 96 (71.1)        | 123 (82.6)       |
| PHILIPS                    | 7 (5.2)          | 2 (1.3)          |
| SIEMENS                    | 23 (17.0)        | 17 (11.4)        |
| TOSHIBA                    | 9 (6.7)          | 7 (4.7)          |
| Slice thickness (mm)       |                  |                  |
| 1                          | 3 (2.2)          | 0 (0.0)          |
| 1.25                       | 9 (6.7)          | 4 (2.7)          |
| 1.5                        | 1 (0.7)          | 0 (0.0)          |
| 2                          | 12 (8.9)         | 8 (5.4)          |
| 2.5                        | 65 (48.1)        | 94 (63.1)        |
| 3                          | 12 (8.9)         | 9 (6.0)          |
| 3.75                       | 3 (2.2)          | 2 (1.3)          |
| 4                          | 1 (0.7)          | 0 (0.0)          |
| 5                          | 29 (21.5)        | 31 (20.8)        |
| 10                         | 0 (0)            | 1 (0.7)          |

**Table S3. Selected 94 reproducible radiomics features input into Lasso selection.** \* All highly skewed ( $|\text{skew}| > 1$ ) and strictly positive radiomic features were log-transformed to reduce skewness and increase information content.

| Radiomics features                  | Category            |
|-------------------------------------|---------------------|
| original_shape_Flatness             | Shape feature       |
| original_shape_LeastAxisLength      | Shape feature       |
| original_firstorder_Uniformity *    | First-order feature |
| original_glcml_lmn*                 | Texture feature     |
| original_glcml_lmc1                 | Texture feature     |
| original_glcml_SumAverage           | Texture feature     |
| original_gldm_LowGrayLevelEmphasis* | Texture feature     |
| original_glszm_ZonePercentage       | Texture feature     |

|                                                       |                 |
|-------------------------------------------------------|-----------------|
| original_ngtdm_Busyness*                              | Texture feature |
| wavelet-LLH_firstorder_Entropy                        | Wavelet feature |
| wavelet-LLH_glcmm_Idm                                 | Wavelet feature |
| wavelet-LLH_glcmm_Imc1                                | Wavelet feature |
| wavelet-LLH_glcmm_Imc2                                | Wavelet feature |
| wavelet-LLH_glcmm_JointEntropy                        | Wavelet feature |
| wavelet-LLH_glcmm_MaximumProbability                  | Wavelet feature |
| wavelet-LLH_gldm_DependenceNonUniformityNormalized*   | Wavelet feature |
| wavelet-LLH_gldm_DependenceVariance                   | Wavelet feature |
| wavelet-LLH_gldm_LargeDependenceEmphasis              | Wavelet feature |
| wavelet-LLH_glrlm_GrayLevelNonUniformityNormalized    | Wavelet feature |
| wavelet-LLH_glrlm_LongRunEmphasis*                    | Wavelet feature |
| wavelet-LLH_glrlm_RunEntropy*                         | Wavelet feature |
| wavelet-LLH_glrlm_RunLengthNonUniformity*             | Wavelet feature |
| wavelet-LLH_glrlm_RunPercentage                       | Wavelet feature |
| wavelet-LLH_glrlm_RunVariance                         | Wavelet feature |
| wavelet-LLH_glszm_ZonePercentage*                     | Wavelet feature |
| wavelet-LHL_firstorder_Median                         | Wavelet feature |
| wavelet-LHL_glcmm_Idn*                                | Wavelet feature |
| wavelet-LHL_glcmm_Imc1                                | Wavelet feature |
| wavelet-LHL_glcmm_Imc2                                | Wavelet feature |
| wavelet-LHL_gldm_DependenceEntropy*                   | Wavelet feature |
| wavelet-LHL_gldm_SmallDependenceLowGrayLevelEmphasis* | Wavelet feature |
| wavelet-LHL_glszm_ZoneEntropy*                        | Wavelet feature |
| wavelet-LHH_glcmm_Imc1                                | Wavelet feature |
| wavelet-LHH_glcmm_Imc2*                               | Wavelet feature |
| wavelet-LHH_gldm_SmallDependenceEmphasis*             | Wavelet feature |
| wavelet-LHH_glrlm_GrayLevelNonUniformityNormalized    | Wavelet feature |
| wavelet-LHH_glrlm_RunLengthNonUniformityNormalized*   | Wavelet feature |
| wavelet-HLL_firstorder_Mean                           | Wavelet feature |
| wavelet-HLL_glcmm_ClusterTendency*                    | Wavelet feature |
| wavelet-HLL_glcmm_Idmn*                               | Wavelet feature |
| wavelet-HLL_glcmm_Idn*                                | Wavelet feature |
| wavelet-HLL_glcmm_Imc1                                | Wavelet feature |
| wavelet-HLL_glcmm_Imc2                                | Wavelet feature |
| wavelet-HLL_gldm_DependenceNonUniformityNormalized*   | Wavelet feature |
| wavelet-HLL_gldm_SmallDependenceEmphasis*             | Wavelet feature |
| wavelet-HLL_ngtdm_Busyness*                           | Wavelet feature |
| wavelet-HLLH_firstorder_10Percentile                  | Wavelet feature |

|                                                     |                 |
|-----------------------------------------------------|-----------------|
| wavelet-HLH_firstorder_90Percentile                 | Wavelet feature |
| wavelet-HLH_firstorder_Entropy*                     | Wavelet feature |
| wavelet-HLH_firstorder_InterquartileRange*          | Wavelet feature |
| wavelet-HLH_firstorder_MeanAbsoluteDeviation*       | Wavelet feature |
| wavelet-HLH_firstorder_Uniformity*                  | Wavelet feature |
| wavelet-HLH_glcmm_DifferenceAverage*                | Wavelet feature |
| wavelet-HLH_glcmm_Idm*                              | Wavelet feature |
| wavelet-HLH_glcmm_Imc2*                             | Wavelet feature |
| wavelet-HLH_glcmm_JointEnergy                       | Wavelet feature |
| wavelet-HLH_glcmm_SumEntropy*                       | Wavelet feature |
| wavelet-HLH_gldm_DependenceEntropy*                 | Wavelet feature |
| wavelet-HLH_gldm_DependenceNonUniformityNormalized* | Wavelet feature |
| wavelet-HLH_gldm_DependenceVariance                 | Wavelet feature |
| wavelet-HLH_gldm_LargeDependenceEmphasis            | Wavelet feature |
| wavelet-HLH_glrmm_GrayLevelNonUniformityNormalized  | Wavelet feature |
| wavelet-HLH_glrmm_RunPercentage*                    | Wavelet feature |
| wavelet-HLH_glrmm_RunVariance                       | Wavelet feature |
| wavelet-HLH_ngtdm_Busyness*                         | Wavelet feature |
| wavelet-HHH_gldm_DependenceVariance                 | Wavelet feature |
| wavelet-HHH_gldm_LargeDependenceEmphasis*           | Wavelet feature |
| wavelet-LLL_firstorder_90Percentile                 | Wavelet feature |
| wavelet-LLL_firstorder_Energy*                      | Wavelet feature |
| wavelet-LLL_firstorder_Entropy                      | Wavelet feature |
| wavelet-LLL_firstorder_Kurtosis*                    | Wavelet feature |
| wavelet-LLL_firstorder_Skewness                     | Wavelet feature |
| wavelet-LLL_glcmm_ClusterProminence*                | Wavelet feature |
| wavelet-LLL_glcmm_ClusterShade                      | Wavelet feature |
| wavelet-LLL_glcmm_DifferenceAverage*                | Wavelet feature |
| wavelet-LLL_glcmm_DifferenceEntropy                 | Wavelet feature |
| wavelet-LLL_glcmm_DifferenceVariance*               | Wavelet feature |
| wavelet-LLL_glcmm_Idn                               | Wavelet feature |
| wavelet-LLL_glcmm_Imc1                              | Wavelet feature |
| wavelet-LLL_glcmm_InverseVariance                   | Wavelet feature |
| wavelet-LLL_glcmm_JointEnergy*                      | Wavelet feature |
| wavelet-LLL_glcmm_JointEntropy                      | Wavelet feature |
| wavelet-LLL_glcmm_SumEntropy*                       | Wavelet feature |
| wavelet-LLL_gldm_DependenceNonUniformityNormalized  | Wavelet feature |
| wavelet-LLL_glrmm_GrayLevelNonUniformity*           | Wavelet feature |
| wavelet-LLL_glrmm_GrayLevelNonUniformityNormalized* | Wavelet feature |



|                                                     |                 |
|-----------------------------------------------------|-----------------|
| wavelet-LLL_glrIm_LongRunHighGrayLevelEmphasis*     | Wavelet feature |
| wavelet-LLL_glrIm_RunLengthNonUniformityNormalized* | Wavelet feature |
| wavelet-LLL_glrIm_ShortRunHighGrayLevelEmphasis*    | Wavelet feature |
| wavelet-LLL_glszm_SmallAreaEmphasis                 | Wavelet feature |
| wavelet-LLL_glszm_ZonePercentage                    | Wavelet feature |
| wavelet-LLL_ngtdm_Busyness*                         | Wavelet feature |
| wavelet-LLL_ngtdm_Coarseness*                       | Wavelet feature |
| wavelet-LLL_ngtdm_Contrast*                         | Wavelet feature |

**Table S4. Comparison of demographics between FH cohort 1 and 2.** Body mass index (BMI), Non-small cell lung carcinoma (NSCLC), Adenocarcinoma (AD), squamous cell carcinoma (SCC). \* Missing values present in BMI (n=1), BMI class (n=1), Family History of lung cancer (n=3), Years since quitting smoking (n=2). † Fisher's exact test (categorical) or Wilcoxon rank-sum test (continuous variables) comparing patients with and without malignancy or two FH cohorts.

| Variable / Level                     | FH Cohort*            |                        |                       | P†           |
|--------------------------------------|-----------------------|------------------------|-----------------------|--------------|
|                                      | Overall (N = 284)     | 1 (n = 135)            | 2 (n = 149)           |              |
| Gender (M)                           | 149 (52.5%)           | 64 (47.4%)             | 85 (57.0%)            | 0.12         |
| Age                                  | 66.50 (33.00 - 94.00) | 67.00 (40.0.0 - 91.00) | 66.00 (33.00 - 94.00) | 0.54         |
| Race                                 |                       |                        |                       | 0.77         |
| African American                     | 6 (2.1%)              | 1 (0.7%)               | 5 (3.4%)              |              |
| Asian                                | 13 (4.6%)             | 5 (3.7%)               | 8 (5.4%)              |              |
| Caucasian                            | 255 (89.8%)           | 125(92.6%)             | 130(87.2%)            |              |
| Hispanic or Latino                   | 2 (0.7%)              | 1(0.7%)                | 1 (0.7%)              |              |
| Native American                      | 3 (1.1%)              | 1 (0.7%)               | 2 (1.3%)              |              |
| Native Hawaiian/Pacific Islander     | 2 (0.7%)              | 1 (0.7%)               | 1 (0.7%)              |              |
| Unknown or Not Reported              | 3 (1.1%)              | 1 (0.7%)               | 2 (1.3%)              |              |
| BMI*                                 | 26.60 (16.14 - 58.65) | 26.70 (17.85 - 58.65)  | 26.40 (16.14 - 52.93) | 0.69         |
| BMI.class*                           |                       |                        |                       | 0.90         |
| normal                               | 113 (39.9%)           | 52 (38.8%)             | 61 (40.9%)            |              |
| overweight                           | 93 (32.9%)            | 44 (32.8%)             | 49 (32.9%)            |              |
| obese                                | 77 (27.2%)            | 38 (28.4%)             | 39 (26.2%)            |              |
| Smoking Status                       |                       |                        |                       | <b>0.006</b> |
| Current smoker                       | 74 (26.1%)            | 45 (33.3%)             | 29 (19.5%)            |              |
| Former smoker                        | 142 (50.0%)           | 67 (49.6%)             | 75 (50.3%)            |              |
| Never smoker                         | 68 (23.9%)            | 23 (17.0%)             | 45(30.2%)             |              |
| Pack Years                           | 25 (0 - 183)          | 28.5 (0 - 183)         | 22.5 (0 - 180)        | 0.06         |
| Prior Cancer History (yes)           | 80 (28.2%)            | 47 (34.8%)             | 33 (22.1%)            | <b>0.02</b>  |
| Family History of lung cancer* (yes) | 77 (27.4%)            | 35 (26.1%)             | 42 (28.6%)            | 0.69         |
| Years since quitting smoking*        | 0 (0 - 64)            | 0 (0 - 58)             | 1 (0 - 64)            | 0.19         |
| Malignancy (yes)                     | 140 (49.3%)           | 69 (51.1%)             | 71 (47.7%)            | 0.63         |
| Histology for NSCLC                  |                       |                        |                       | 0.21         |
| AD                                   | 107 (76.4%)           | 56(81.2%)              | 51 (71.8%)            |              |

|                      |            |            |            |              |
|----------------------|------------|------------|------------|--------------|
| AD, SCC              | 1 (0.7%)   | 0 (0.0%)   | 1 (1.4%)   | <b>0.008</b> |
| Large cell carcinoma | 1 (0.7%)   | 1 (1.4%)   | 0 (0.0%)   |              |
| SCC                  | 31 (22.1%) | 12 (17.4%) | 19 (26.8%) |              |
| NSCLC stage          |            |            |            |              |
| 0                    | 2 (1.4%)   | 2 (2.9%)   | 0 (0.0%)   |              |
| I                    | 95 (67.9%) | 40 (58.0%) | 55 (77.5%) |              |
| II                   | 12 (8.6%)  | 4 (5.8%)   | 8 (11.3%)  |              |
| III                  | 13 (9.3%)  | 9 (13.0%)  | 4 (5.6%)   |              |
| IV                   | 18 (12.9%) | 14 (20.3%) | 4 (5.6%)   |              |

**Table S5. Distribution of semantic features in Fred Hutch (FH) 1 and FH2 cohorts.**

| Variable                              | FH1 (n=135)         |                    | P†               | FH2 (n=149)         |                    | P†               |
|---------------------------------------|---------------------|--------------------|------------------|---------------------|--------------------|------------------|
|                                       | Control<br>(n = 66) | Case<br>(n = 69)   |                  | Control<br>(n = 78) | Case<br>(n = 71)   |                  |
| Nodule location                       |                     |                    |                  |                     |                    |                  |
| Left upper lobe                       | 14 (21.2)           | 16 (23.2)          | 0.84             | 10 (12.8)           | 16 (22.5)          | 0.13             |
| Lingula                               | 2 (3.0)             | 0 (0.0)            | 0.24             | 5 (6.4)             | 3 (4.2)            | 0.72             |
| Left lower lobe                       | 9 (13.6)            | 4 (5.8)            | 0.15             | 12 (15.4)           | 15 (21.1)          | 0.40             |
| Right upper lobe                      | 17 (25.8)           | 29 (42.0)          | 0.07             | 18 (23.1)           | 23 (32.4)          | 0.27             |
| Right middle lobe                     | 7 (10.6)            | 1 (1.4)            | <b>0.03</b>      | 7 (9.0)             | 3 (4.2)            | 0.33             |
| Right lower lobe                      | 17 (25.8)           | 19 (27.5)          | 0.85             | 25 (32.1)           | 11 (15.5)          | <b>0.02</b>      |
| Other                                 | 0 (0.0)             | 0 (0.0)            | NA               | 1 (1.3)             | 0 (0.0)            | >0.99            |
| Vector Magnitude [mm]                 | 20.0 (9.0 - 49.0)   | 31.0 (13.0 - 61.0) | <b>&lt;0.001</b> | 20.0 (9.0 - 57.0)   | 31.0 (11.0 - 60.0) | <b>&lt;0.001</b> |
| Long axis of solid component [mm]     | NA                  | 10.0 (3.0 - 30.0)  | NA               | 7.0 (4.0 - 13.0)    | 10.0 (3.0 - 28.0)  | 0.24             |
| Nodule margin                         |                     |                    |                  |                     |                    |                  |
| Smooth                                | 25 (37.9)           | 1 (1.4)            | <b>&lt;0.001</b> | 34 (43.6)           | 2 (2.8)            | <b>&lt;0.001</b> |
| Irregular                             | 33 (50.0)           | 51 (73.9)          | <b>&lt;0.01</b>  | 39 (50.0)           | 43 (60.6)          | 0.25             |
| Scalloped                             | 8 (12.1)            | 15 (21.7)          | 0.17             | 5 (6.4)             | 23 (32.4)          | <b>&lt;0.001</b> |
| Spiculated                            | 1 (1.5)             | 18 (26.1)          | <b>&lt;0.001</b> | 0 (0.0)             | 14 (19.7)          | <b>&lt;0.001</b> |
| Corona.radiata                        | 0 (0.0)             | 9 (13.0)           | <b>&lt;0.01</b>  | 0 (0.0)             | 3 (4.2)            | 0.11             |
| Nodule density                        |                     |                    |                  |                     |                    |                  |
| Solid                                 | 63 (95.5)           | 48 (69.6)          | <b>&lt;0.001</b> | 68 (87.2)           | 47 (66.2)          | <b>&lt;0.001</b> |
| Part-solid                            | 0 (0.0)             | 19 (27.5)          | <b>&lt;0.001</b> | 5 (6.4)             | 24 (33.8)          | <b>&lt;0.001</b> |
| Non-solid                             | 3 (4.5)             | 2 (2.9)            | 0.68             | 5 (6.4)             | 0 (0.0)            | 0.06             |
| Cavitary                              | 3 (4.5)             | 4 (5.8)            | >0.99            | 3 (3.8)             | 2 (2.8)            | >0.99            |
| Pseudocavitary                        | 1 (1.5)             | 2 (2.9)            | >0.99            | 0 (0.0)             | 3 (4.2)            | 0.11             |
| Calcification with benign pattern     | 1 (1.5)             | 0 (0.0)            | 0.49             | 2 (2.6)             | 0 (0.0)            | 0.50             |
| Calcification with non-benign.pattern | 1 (1.5)             | 0 (0.0)            | 0.49             | 0 (0.0)             | 0 (0.0)            | NA               |
| Number of nodules                     |                     |                    |                  |                     |                    |                  |
| 1 nodule                              | 11 (16.7)           | 14 (20.3)          | 0.66             | 18 (23.1)           | 14 (19.7)          | 0.69             |
| 2-6 nodules                           | 41 (62.1)           | 42 (60.9)          | >0.99            | 42 (53.8)           | 45 (63.4)          | 0.25             |
| More than 6 nodules                   | 14 (21.2)           | 13 (18.8)          | 0.83             | 18 (23.1)           | 12 (16.9)          | 0.42             |

|                                                                                                                       |                 |                 |       |                 |                 |        |
|-----------------------------------------------------------------------------------------------------------------------|-----------------|-----------------|-------|-----------------|-----------------|--------|
| Emphysema score                                                                                                       | 0.8 (0.5 - 4.0) | 1.0 (0.5 - 4.0) | 0.02  | 0.5 (0.5 - 3.0) | 1.0 (0.5 - 3.0) | <0.001 |
| 0 (none affected)                                                                                                     | 26 (39.4)       | 18 (26.1)       |       | 46 (59.0)       | 22 (31.0)       |        |
| 0.5 (0~5% affected)                                                                                                   | 20 (39.4)       | 14 (20.3)       |       | 17 (21.8)       | 18 (25.4)       |        |
| 1.0 (6~25% affected)                                                                                                  | 9 (13.6)        | 19 (27.5)       |       | 5 (6.4)         | 16 (22.5)       |        |
| 2.0 (26~50% affected)                                                                                                 | 4 (6.1)         | 7 (10.1)        |       | 4 (5.1)         | 9 (12.7)        |        |
| 3.0 (51~75% affected)                                                                                                 | 4 (6.1)         | 9 (13.0)        |       | 6 (7.7)         | 6 (8.5)         |        |
| 4.0 (>75% affected)                                                                                                   | 3 (4.5)         | 2 (2.9)         |       | 0 (0.0)         | 0 (0.0)         |        |
| Pattern of emphysema                                                                                                  |                 |                 |       |                 |                 |        |
| Centrilobular                                                                                                         | 36 (54.5)       | 51 (73.8)       | 0.03  | 29 (37.1)       | 46 (64.8)       | 0.68   |
| Panlobular                                                                                                            | 4 (6.0)         | 5 (7.2)         | >0.99 | 4 (5.1)         | 1 (1.4)         | 0.08   |
| Paraseptal                                                                                                            | 4 (6.0)         | 5 (7.2)         | >0.99 | 7 (9.0)         | 11 (15.5)       | >0.99  |
| Region of emphysema                                                                                                   |                 |                 |       |                 |                 |        |
| Upper lobe predominant                                                                                                | 32 (48.5)       | 43 (62.3)       | 0.59  | 29 (37.2)       | 46 (64.8)       | 0.68   |
| Lower lobe predominant                                                                                                | 1 (1.5)         | 0 (0.0)         | 0.44  | 0 (0.0)         | 1 (1.4)         | >0.99  |
| Diffuse                                                                                                               | 7 (10.6)        | 7 (10.1)        | 0.77  | 3 (3.8)         | 2 (2.8)         | 0.38   |
| Other                                                                                                                 | 0 (0.0)         | 1 (1.4)         | >0.99 | 0 (0.0)         | 0 (0.0)         | >0.99  |
| Evidence of fibrosis                                                                                                  | 3 (4.5)         | 5 (7.2)         | 0.72  | 8 (10.3)        | 7 (9.9)         | >0.99  |
| Evidence of asbestosis                                                                                                | 0 (0.0)         | 0 (0.0)         | NA    | 1 (1.3)         | 0 (0.0)         | >0.99  |
| Evidence of invasion                                                                                                  |                 |                 |       |                 |                 |        |
| No invasion                                                                                                           | 63 (95.5)       | 57 (82.6)       | 0.03  | 77 (98.7)       | 53 (74.6)       | <0.001 |
| Invasion into pleura or fissure                                                                                       | 2 (3.0)         | 9 (13.0)        | 0.06  | 1 (1.3)         | 16 (22.5)       | <0.001 |
| Invasion into other structures like hilum, mediastinum, large airway, heart or great vessels, chest wall or vertebrae | 1 (1.5)         | 3 (4.3)         | 0.62  | 0 (0.0)         | 2 (2.8)         | 0.23   |
| Lymph nodes                                                                                                           |                 |                 |       |                 |                 |        |
| No lymphadenopathy                                                                                                    | 46 (69.7)       | 33 (47.8)       | 0.01  | 39 (50.0)       | 40 (56.3)       | 0.51   |
| No pathologic enlargement                                                                                             | 7 (10.6)        | 8 (11.6)        | >0.99 | 31 (39.7)       | 18 (25.4)       | 0.08   |
| Non-pathologic calcified node                                                                                         | 2 (3.0)         | 1 (1.4)         | 0.61  | 2 (2.6)         | 2 (2.8)         | >0.99  |
| Enlargement of ipsilateral intrapulmonary, peribronchial or hilar                                                     | 1 (1.5)         | 3 (4.3)         | 0.62  | 1 (1.3)         | 1 (1.4)         | >0.99  |
| Enlargement of ipsilateral mediastinal, subcarinal nodes                                                              | 3 (4.5)         | 7 (10.1)        | 0.33  | 2 (2.6)         | 5 (7.0)         | 0.26   |
| Enlargement of contralateral mediastinal or hilar                                                                     | 7 (10.6)        | 17 (24.6)       | 0.04  | 3 (3.8)         | 5 (7.0)         | 0.48   |

**Table S6. Plasma biomarker input into Lasso selection.**

| Biomarker type | Gene Name | FH1 Cohort |        | FH2 Cohort |        |
|----------------|-----------|------------|--------|------------|--------|
|                |           | coef       | pvalue | coef       | pvalue |
| SleA           | VHL       | 0.218      | 0.101  | 0.642      | 0.001  |
| SleA           | WNT5B     | 1.052      | 0.000  | 0.429      | 0.007  |
| SleA           | TNFAIP6   | 0.224      | 0.106  | 0.383      | 0.017  |
| SleA           | FETUB     | 0.261      | 0.050  | 0.299      | 0.039  |

|           |         |       |       |       |       |
|-----------|---------|-------|-------|-------|-------|
| SleA      | CD22    | 0.614 | 0.004 | 0.248 | 0.075 |
| SleA      | MUC16   | 0.463 | 0.003 | 0.246 | 0.082 |
| SleA      | SCN3B   | 0.329 | 0.030 | 0.260 | 0.087 |
| SleX      | TET1    | 0.473 | 0.002 | 0.478 | 0.004 |
| SleX      | FETUB   | 0.261 | 0.050 | 0.380 | 0.009 |
| SleX      | THBS1   | 0.399 | 0.009 | 0.410 | 0.021 |
| SleX      | WNT5B   | 1.052 | 0.000 | 0.333 | 0.028 |
| SleX      | C4B     | 0.259 | 0.063 | 0.356 | 0.029 |
| SleX      | EVI1    | 0.358 | 0.040 | 0.324 | 0.029 |
| SleX      | PHB     | 0.405 | 0.014 | 0.335 | 0.030 |
| SleX      | AFP     | 0.496 | 0.005 | 0.296 | 0.045 |
| SleX      | ALPL    | 0.710 | 0.000 | 0.274 | 0.053 |
| SleX      | HP      | 0.253 | 0.089 | 0.304 | 0.059 |
| SleX      | TNFRSF8 | 0.767 | 0.000 | 0.244 | 0.073 |
| SleX      | KDM5B   | 0.655 | 0.000 | 0.240 | 0.087 |
| IgG       | SMARCA2 | 0.234 | 0.081 | 0.454 | 0.004 |
| IgG       | RGL1    | 0.722 | 0.000 | 0.469 | 0.011 |
| IgG       | MDH2    | 0.450 | 0.003 | 0.390 | 0.012 |
| IgG       | NRP1    | 0.301 | 0.045 | 0.594 | 0.014 |
| IgG       | CLNS1A  | 0.405 | 0.022 | 0.360 | 0.026 |
| IgG       | WNT5B   | 0.296 | 0.036 | 0.325 | 0.043 |
| IgG       | YES1    | 0.214 | 0.093 | 0.311 | 0.049 |
| IgG       | WNT10A  | 0.613 | 0.000 | 0.261 | 0.079 |
| IgG       | CDC25C  | 0.420 | 0.009 | 0.253 | 0.080 |
| IgG       | RECQL4  | 0.406 | 0.014 | 0.249 | 0.093 |
| IgM       | WNT10A  | 0.540 | 0.004 | 0.475 | 0.004 |
| IgM       | TRPV6   | 0.343 | 0.034 | 0.217 | 0.082 |
| IgM       | EPHA2   | 0.370 | 0.037 | 0.203 | 0.093 |
| Proteomic | IL13RA1 | 0.477 | 0.001 | 0.559 | 0.002 |
| Proteomic | TRPV6   | 0.348 | 0.038 | 0.533 | 0.003 |
| Proteomic | FMN1    | 0.393 | 0.018 | 0.481 | 0.006 |
| Proteomic | SPFH2   | 0.377 | 0.028 | 0.477 | 0.006 |
| Proteomic | EXT2    | 0.226 | 0.092 | 0.370 | 0.009 |
| Proteomic | NCK1    | 0.403 | 0.010 | 0.428 | 0.009 |
| Proteomic | PHLPPL  | 0.431 | 0.005 | 0.498 | 0.012 |
| Proteomic | CAMK1   | 0.309 | 0.056 | 0.407 | 0.018 |
| Proteomic | SMAD2   | 0.405 | 0.012 | 0.347 | 0.021 |
| Proteomic | NTNG2   | 0.241 | 0.087 | 0.374 | 0.029 |
| Proteomic | BIRC2   | 0.258 | 0.085 | 0.315 | 0.032 |
| Proteomic | SMAD2   | 0.405 | 0.012 | 0.352 | 0.035 |
| Proteomic | CSF3    | 0.257 | 0.066 | 0.330 | 0.040 |
| Proteomic | ERCC2   | 0.486 | 0.004 | 0.339 | 0.041 |
| Proteomic | KIFC3   | 0.361 | 0.039 | 0.265 | 0.051 |
| Proteomic | INHBC   | 0.553 | 0.002 | 0.314 | 0.052 |
| Proteomic | SLC30A8 | 0.345 | 0.032 | 0.264 | 0.056 |
| Proteomic | LIFR    | 0.471 | 0.042 | 0.269 | 0.060 |

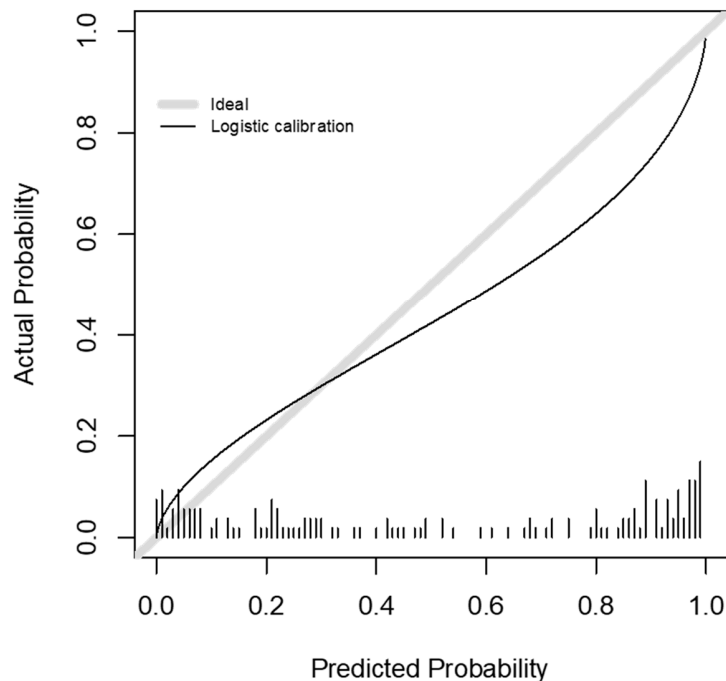

**Figure S1. Calibration of the PSR model in FH2 cohort.** The fitted logistic calibration curve has intercept  $-0.31$  (95% CI:  $-0.73, 0.096$ ) and slope  $0.64$  (95% CI:  $0.45, 0.86$ ). An ideal calibration curve has intercept of zero and slope of one. These estimates of slope and intercept suggest an adequate overall calibration, although as seen by the curve the model may overestimate high risk and, to a lesser extent, underestimate low risk.

65. Zhao, B.; Shwartz, L.H.; Kris, M.G. Data from RIDER\_Lung CT. The Cancer Imaging Archive. **2015**. <https://wiki.cancerimagingarchive.net/display/Public/RIDER+Lung+CT>.
66. Wee, L.; Aerts, H.J.L.; Kalendralis, P.; Dekker, A. Data from NSCLC-Radiomics-Interobserver1 [Data set]. The Cancer Imaging Archive. **2019**. <https://wiki.cancerimagingarchive.net/display/Public/NSCLC-Radiomics-Interobserver1>
67. Du, D.; Gu, J.; Chen, X.; Lv, W.; Feng, Q.; Rahmim, A.; Wu, H.; Lu, L. Integration of PET/CT Radiomics and Semantic Features for Differentiation between Active Pulmonary Tuberculosis and Lung Cancer. *Mol Imaging Biol* **23**, 287–298 (2021).
